# Supplementary material for: Hierarchical mesoporous/macroporous Co3O4 ultrathin nanosheets as free-standing catalysts for rechargeable lithium–oxygen batteries
Source: Royal Society of Chemistry journal article supplement (doi:10.1039/c5ta04673d), 2015-01-01
Supplement: c5ta04673d1.pdf [file c5ta04673d1.pdf]

## Supporting Information

### **Hierarchical mesoporous/macroporous Co<sub>3</sub>O<sub>4</sub> ultrathin nanosheets as free-standing catalysts for rechargeable lithium–oxygen batteries**

Feng Wu<sup>a,b</sup>, Xiaoxiao Zhang<sup>a</sup>, Taolin Zhao<sup>a</sup>, Renjie Chen<sup>a,b\*</sup>, Yusheng Ye<sup>a</sup>, Man Xie<sup>a</sup>, Li Li<sup>a,b</sup>

a. Beijing Key Laboratory of Environmental Science and Engineering, School of Materials Science and

Engineering, Beijing Institute of Technology, Beijing 100081, China

b. Collaborative Innovation Center of Electric Vehicles in Beijing, Beijing 100081, China

E-mail address: chenrj@bit.edu.cn (R. Chen)

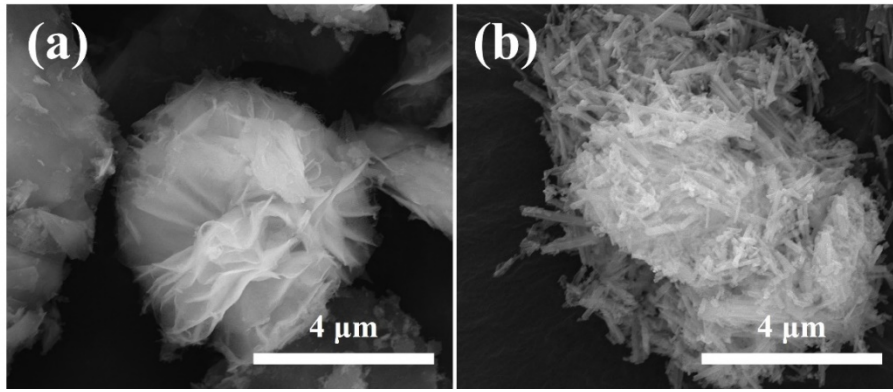

**Figure S1.** SEM images of the EG-CO (a) and DW-CO (b) powders synthesized without Ni foam.

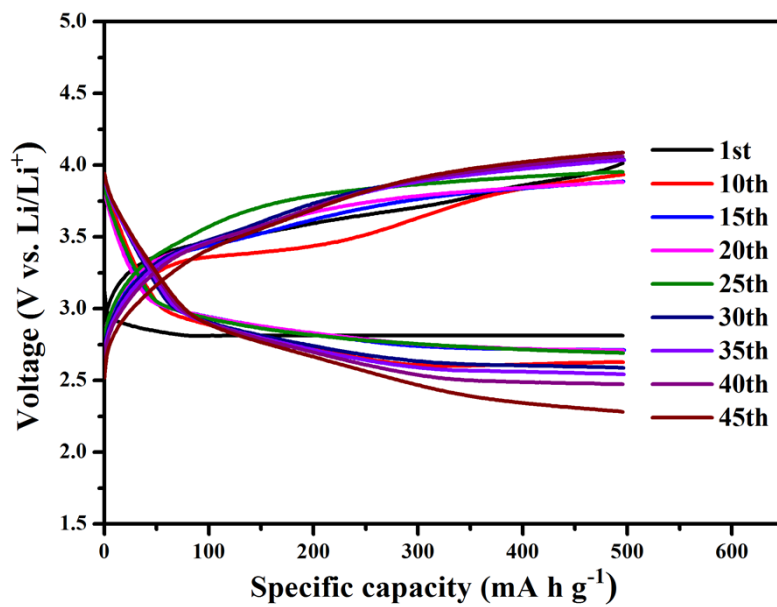

**Figure S2.** Discharge/charge profiles of the DW-CO sample at various cycles with the capacity limited to 500 mA h g<sup>-1</sup>.

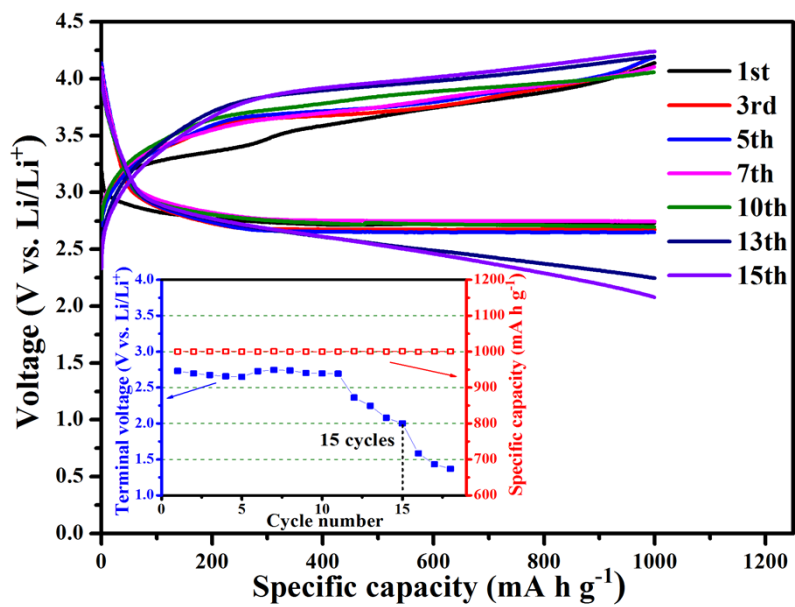

**Figure S3.** Discharge/charge profiles of the DW-CO sample at various cycles with the capacity limited to 1000 mA h g<sup>-1</sup> (inset is voltage of the terminal discharge vs. the cycle number curve).
